# Supplementary material
Source: PubMed Central journal article supplement (PMC3631016)
Supplement: Supp_Fig1.pdf [file Supp_Fig1.pdf]

## Supplementary Data

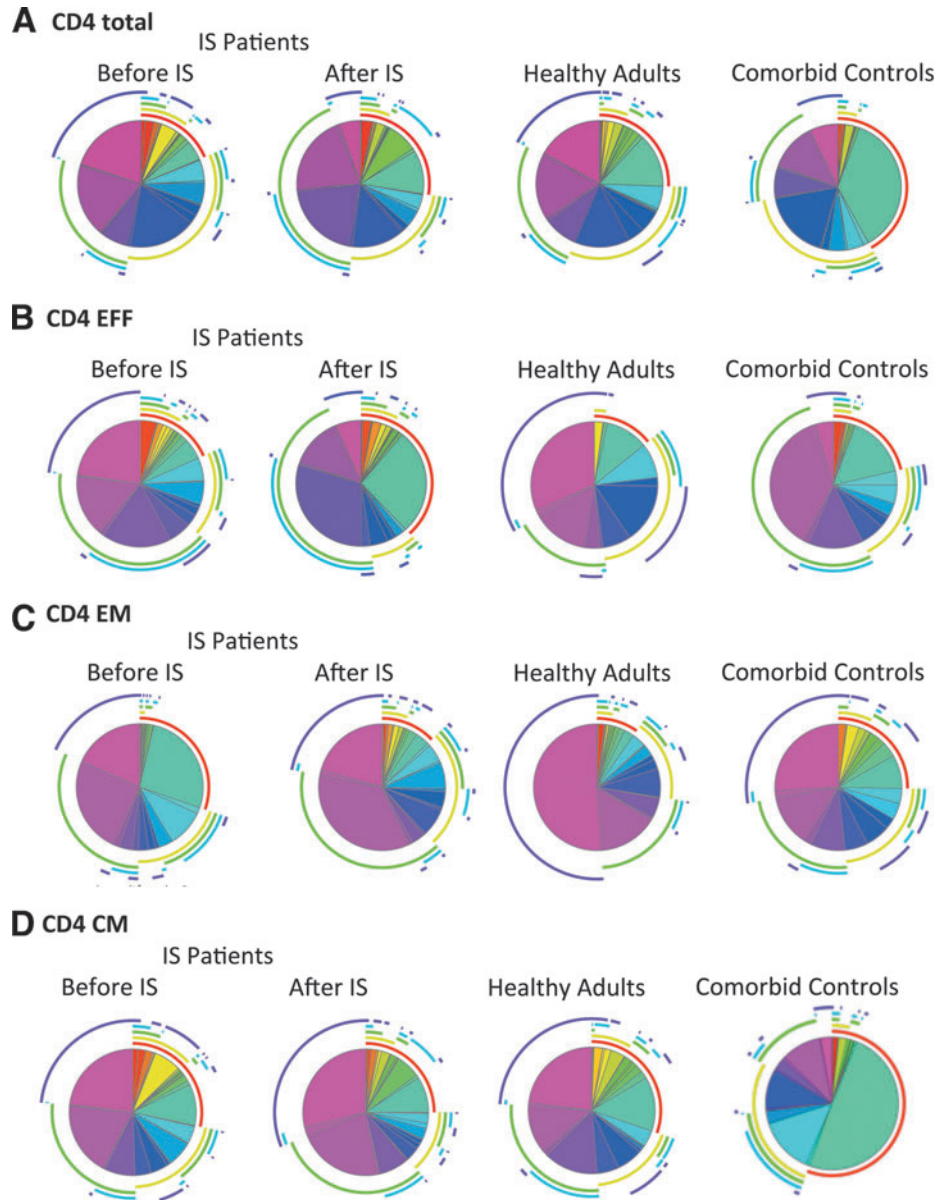

**SUPPLEMENTARY FIG. S1.** CD4<sup>+</sup> T cell response to AAV capsid. The pie charts show the distribution of functions within the various AAV capsid-specific CD4<sup>+</sup> T cell subsets. The color schemes for the various pie slices are described in the caption to Fig. 3. Contributions of individual functions are highlighted by the pie arcs, which show IFN- $\gamma$  in red, IL-2 in light green, MIP-1 $\alpha$  in bright green, perforin in blue, and TNF- $\alpha$  in purple. **(A)** Total CD4<sup>+</sup> effector T cells; **(B)** CD4<sup>+</sup> effector T cells; **(C)** CD4<sup>+</sup> effector memory T cells; **(D)** CD4<sup>+</sup> central memory T cells.
