# Supplementary material
Source: PubMed Central journal article supplement (PMC3631016)
Supplement: Supp_Fig2.pdf [file Supp_Fig2.pdf]

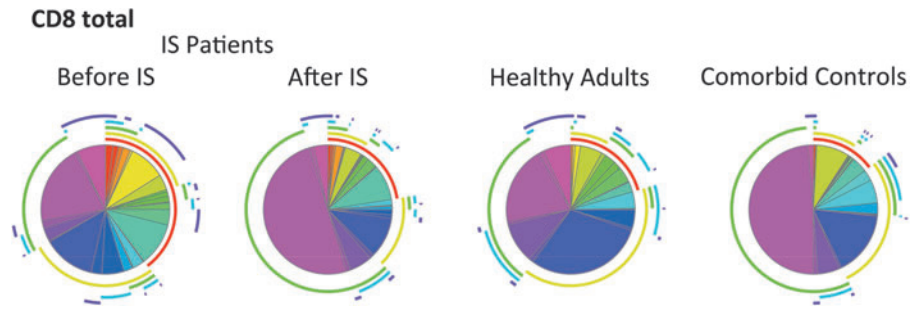

**SUPPLEMENTARY FIG. S2.** Distribution of functions of total AAV capsid-specific CD8<sup>+</sup> T cells. The color schemes for the various pie slices are described in the caption to Fig. 3.
