# Supplementary material
Source: PubMed Central journal article supplement (PMC3631016)
Supplement: Supp_Table1.pdf [file Supp_Table1.pdf]

**Suppl. Table 1A IS patients characteristics**

| Transplant Patient ID Number | Age | Gender (M/F) | Race <sup>1</sup> (C, AA, H) | Etiology of Organ Failure           | Transplant <sup>9</sup> (K, L) | Initial IS regimen                  | IS regimen on date of 2nd blood sample |
|------------------------------|-----|--------------|------------------------------|-------------------------------------|--------------------------------|-------------------------------------|----------------------------------------|
| 4                            | 57  | M            | C                            | HCV <sup>2</sup>                    | L                              | Prograf, S <sup>10</sup>            | Prograf, S, Aza                        |
| 5                            | 49  | M            | C                            | HCV                                 | L                              | Prograf, S                          | Prograf, S, Aza                        |
| 9                            | 68  | M            | C                            | ETOH <sup>3</sup> /HCC <sup>4</sup> | L                              | Prograf, S, Aza <sup>11</sup>       | Prograf, S                             |
| 11                           | 59  | M            | AA                           | HCV/ETOH                            | L                              | Prograf, S, Aza                     | Sirolimus, MMF, S                      |
| 12                           | 49  | M            | AA                           | Chronic Interstitial Nephritis      | K                              | Sim                                 | Prograf, S, MMF                        |
| 14                           | 65  | M            | AA                           | Lupus                               | K                              | MMF, S, Sim <sup>12</sup>           | Prograf, S, MMF                        |
| 15                           | 59  | M            | C                            | Polycystic Kidney Disease           | K                              | Prograf, S, MMF <sup>13</sup> , Sim | Prograf, S, MMF                        |
| 17                           | 59  | F            | C                            | PBC <sup>5</sup>                    | L                              | Prograf, S, Aza                     | Prograf, S, MMF                        |
| 22                           | 47  | M            | C                            | Cholangitis                         | L                              | Prograf, S, MMF                     | Prograf, S, MMF                        |
| 24                           | 53  | M            | AA                           | HCV                                 | L                              | Prograf, S, Aza                     | Prograf, S, Aza                        |
| 26                           | 73  | M            | C                            | PSC <sup>6</sup>                    | L                              | Prograf, S, Aza                     | Prograf, S, Aza                        |
| 30                           | 29  | F            | C                            | Cystic Fibrosis                     | L                              | Prograf, S                          | Prograf, S, Aza                        |
| 34                           | 25  | M            | AA                           | Biliary Atresia/HCV                 | L                              | Prograf, S, Aza                     | Prograf, S, Aza                        |
| 37                           | 62  | M            | C                            | HCV                                 | L                              | Prograf, S, Aza                     | Prograf, S, Aza                        |
| 39                           | 59  | F            | C                            | HCV                                 | L                              | Prograf, S, Aza                     | Prograf, S, Aza                        |
| 40                           | 57  | M            | C                            | HCV                                 | L                              | Prograf, S, Aza                     | Prograf, S, Aza                        |
| 42                           | 63  | M            | C                            | NASH <sup>7</sup>                   | L                              | Prograf, S                          | Prograf, S, Aza                        |
| 43                           | 53  | M            | AA                           | HBV <sup>8</sup>                    | L                              | Prograf, S, MMF                     | Prograf, S, Aza                        |
| 44                           | 57  | M            | AA                           | HCV                                 | L                              | Prograf, S, MMF                     | Prograf, S, MMF                        |
| 45                           | 64  | F            | C                            | ETOH                                | L                              | Prograf, S, MMF                     | Prograf, S, MMF                        |
| 46                           | 43  | M            | C                            | Cryptogenic                         | L                              | Prograf, S, MMF                     | Prograf, S, MMF                        |
| 47                           | 54  | M            | C                            | ETOH                                | L                              | Prograf, S, Aza                     | Prograf, S, Aza                        |
| 48                           | 56  | M            | C                            | HCV                                 | L                              | Prograf, S                          | Prograf, S, MMF                        |

|    |    |   |    |                          |   |                 |                 |
|----|----|---|----|--------------------------|---|-----------------|-----------------|
| 49 | 58 | M | H  | NASH                     | L | Prograf, S, Aza | Prograf, S, Aza |
| 50 | 59 | F | C  | HCV                      | L | Prograf, S, MMF | Prograf, S, MMF |
| 51 | 53 | M | C  | HCV                      | L | Prograf, S, Aza | Prograf, S, Aza |
| 52 | 54 | M | C  | PSC                      | L | Prograf, S, MMF | Prograf, S, MMF |
| 53 | 39 | M | C  | Cryptogenic              | L | Prograf, S, Aza | Prograf, S, Aza |
| 54 | 61 | M | C  | HCV                      | L | Prograf, S, Aza | Prograf, S      |
| 56 | 64 | M | C  | Autoimmune               | L | Prograf, S, Aza | Prograf, S, Aza |
| 57 | 55 | M | C  | HCV                      | L | Prograf, S, Aza | Prograf, S      |
| 58 | 65 | M | `  | ETOH                     | L | Prograf, S, MMF | Prograf, S, MMF |
| 59 | 59 | M | AA | HCV/HCC                  | L | Prograf, S, MMF | Prograf, S, MMF |
| 60 | 65 | M | AA | Hepatopulmonary syndrome | L | Prograf, S, Aza | Prograf, S, Aza |

<sup>1</sup>Race: C - Caucasian, AA - Afro-American, H - Hispanic

<sup>2</sup> HCV - hepatitis C virus

<sup>3</sup>ETOH - alcohol

<sup>4</sup>HCC - hepatocellular carcinoma

<sup>5</sup>PBC - primary biliary cirrhosis

<sup>6</sup>PSC - primary sclerosing cholangitis

<sup>7</sup>NASH - non-alcoholic steatohepatitis

<sup>8</sup>HBV - hepatitis B virus

<sup>9</sup>Transplant: K - kidney, L - liver

<sup>10</sup>S - steroids

<sup>11</sup>Aza – Azathioprine

<sup>12</sup>Sim – Simulect

<sup>13</sup>MMF - mycophenolate mofetil

**Suppl. Table 1B Characteristics of healthy controls**

| <b>Healthy subject ID</b> | <b>Age</b> | <b>Gender</b> | <b>Race</b>    |
|---------------------------|------------|---------------|----------------|
| 2233                      | 39         | M             | AA             |
| 1301                      | 52         | M             | AA             |
| 1598                      | 58         | F             | AA             |
| 6523                      | 58         | F             | AA             |
| 6634                      | 38         | F             | A <sup>1</sup> |
| 1030                      | 43         | F             | AA             |
| 1887                      | 42         | M             | AA             |
| 7601                      | 53         | F             | AA             |
| 1317                      | 24         | F             | C              |
| 1813                      | 57         | M             | AA             |
| 3266                      | 51         | M             | C              |
| 8133                      | 52         | M             | AA             |
| 1181                      | 24         | F             | AA             |
| 1323                      | 50         | M             | C              |
| 1715                      | 45         | M             | C              |
| 9890                      | 42         | M             | C              |

<sup>1</sup>A - Asian

**Suppl. Table 1C Characteristics of comorbid controls**

| <b>Comorbid<br/>Subject ID #</b> | <b>Age</b> | <b>Gender</b> | <b>Race</b> | <b>Diagnosis</b> |
|----------------------------------|------------|---------------|-------------|------------------|
| 1                                | 51         | F             | C           | ETOH             |
| 2                                | 42         | M             | AA          | HCV              |
| 4                                | 72         | M             | C           | HBV              |
| 5                                | 61         | M             | C           | HCV              |
| 6                                | 61         | M             | AA          | HCV              |
| 7                                | 56         | F             | AA          | HCV              |
| 8                                | 61         | F             | C           | HCV              |
| 9                                | 64         | M             | H           | HCV              |
| 10                               | 48         | M             | C           | HCV              |
| 11                               | 61         | M             | C           | ETOH             |
| 12                               | 59         | F             | AA          | HCV              |
| 13                               | 59         | M             | AA          | HCV/HCC          |
| 14                               | 54         | F             | C           | AIH <sup>1</sup> |
| 15                               | 45         | M             | C           | NASH             |
| 16                               | 43         | M             | AA          | PSC/AIH          |
| 17                               | 57         | M             | C           | HCV              |
| 18                               | 32         | M             | C           | PSC              |
| 19                               | 57         | M             | C           | HCV              |
| 20                               | 55         | F             | C           | PBC              |

<sup>1</sup>AIH – autoimmune hepatitis

Other abbreviations are listed in legend to supplementary Table 1
