# Supplementary material
Source: PubMed Central journal article supplement (PMC3631016)
Supplement: Supp_Table2.pdf [file Supp_Table2.pdf]

**Suppl. Table 2 Comparison of cell subsets**

| Variable      | Original p values |                 |                |
|---------------|-------------------|-----------------|----------------|
|               | Cohort: T vs H    | Cohort: T vs C  | Cohort: H vs C |
| <b>CD3</b>    | <b>0.00005</b>    | <b>0.0082</b>   | 0.5104         |
| <b>CD4</b>    | <b>0.0015</b>     | 0.0593          | 0.3462         |
| <b>CD4EFF</b> | 0.7557            | <b>0.0009</b>   | <b>0.0275</b>  |
| <b>CD4EM</b>  | 0.2371            | <b>0.000003</b> | <b>0.0017</b>  |
| <b>CD8</b>    | <b>0.0063</b>     | 0.6392          | <b>0.0325</b>  |

T – transplant patients, H – healthy adults, C – subjects with comorbidities
