# Supplementary material
Source: PubMed Central journal article supplement (PMC3631016)
Supplement: Supp_Table3.pdf [file Supp_Table3.pdf]

Suppl. Table 3A Comparison of CD4 cells according to clinical factors

|                         | CD4         |           |                | CD4EFF      |           |                | CD4EM       |           |                | CD4CM       |           |                |
|-------------------------|-------------|-----------|----------------|-------------|-----------|----------------|-------------|-----------|----------------|-------------|-----------|----------------|
|                         | <i>down</i> | <i>up</i> | <i>p value</i> |
| <b>Total</b>            | 25          | 4         |                | 26          | 5         |                | 20          | 6         |                | 24          | 3         |                |
| <b>Age</b>              |             |           | 1.000          |             |           | 0.6254         |             |           | 1.000          |             |           | 0.2308         |
| <=56                    | 12          | 2         |                | 10          | 3         |                | 8           | 3         |                | 12          | 0         |                |
| >56                     | 13          | 2         |                | 16          | 2         |                | 12          | 3         |                | 12          | 3         |                |
| <b>Gender</b>           |             |           | 1.000          |             |           | 0.5249         |             |           | 0.5425         |             |           | 1.000          |
| <i>F</i>                | 3           | 0         |                | 3           | 1         |                | 4           | 0         |                | 4           | 0         |                |
| <i>M</i>                | 22          | 4         |                | 23          | 4         |                | 16          | 6         |                | 20          | 3         |                |
| <b>Race</b>             |             |           | 0.3736         |             |           | 0.4018         |             |           |                |             |           | 1.000          |
| <i>AA</i>               | 9           | 0         |                | 8           | 0         |                | 5           | 2         | 1.000          | 8           | 1         |                |
| <i>C</i>                | 15          | 4         |                | 17          | 5         |                | 14          | 4         |                | 15          | 2         |                |
| <i>H</i>                | 1           | 0         |                | 1           | 0         |                | 1           | 0         |                | 1           | 0         |                |
| <b>Etiology</b>         |             |           | 0.6729         |             |           | 0.5538         |             |           | 0.3521         |             |           | 0.6800         |
| <i>alcohol</i>          | 2           | 0         |                | 1           | 1         |                | 3           | 0         |                | 2           | 0         |                |
| <i>auto-immune</i>      | 3           | 0         |                | 4           | 1         |                | 2           | 0         |                | 4           | 0         |                |
| <i>nash_cryptogenic</i> | 4           | 0         |                | 4           | 0         |                | 1           | 0         |                | 4           | 0         |                |
| <i>viral</i>            | 11          | 4         |                | 14          | 2         |                | 9           | 6         |                | 10          | 3         |                |
| <i>others</i>           | 5           | 0         |                | 3           | 1         |                | 5           | 0         |                | 4           | 0         |                |
| <b>regimen</b>          |             |           | 0.5343         |             |           | 0.4148         |             |           | 1.000          |             |           | 1.000          |
| <i>M+S+Sim</i>          | 1           | 0         |                | 1           | 0         |                | 0           | 0         |                | 1           | 0         |                |
| <i>P+M+S</i>            | 8           | 0         |                | 7           | 2         |                | 5           | 1         |                | 6           | 1         |                |
| <i>P+S</i>              | 4           | 1         |                | 3           | 2         |                | 3           | 1         |                | 4           | 0         |                |
| <i>P+S+A</i>            | 11          | 3         |                | 14          | 1         |                | 11          | 4         |                | 12          | 2         |                |
| <i>Sim</i>              | 1           | 0         |                | 1           | 0         |                | 1           | 0         |                | 1           | 0         |                |

Patients distribution according to clinical factors and change status, CD4 related categories (stable patients were excluded). P values listed are from the Fisher exact test.

**Suppl. Table 3B Comparison of CD8 cells according to clinical factors**

|                         | CD8         |           |                | CD8EFF      |           |                | CD8EM       |           |                | CD8CM       |           |                |
|-------------------------|-------------|-----------|----------------|-------------|-----------|----------------|-------------|-----------|----------------|-------------|-----------|----------------|
|                         | <i>down</i> | <i>up</i> | <i>p value</i> |
| <b>Total</b>            | 18          | 6         |                | 14          | 11        |                | 25          | 2         |                | 20          | 7         |                |
| <b>Age</b>              |             |           | 0.166          |             |           | 0.6968         |             |           | 1.000          |             |           | 0.4082         |
| <=56                    | 10          | 1         |                | 5           | 5         |                | 11          | 1         |                | 10          | 2         |                |
| >56                     | 8           | 5         |                | 9           | 6         |                | 14          | 1         |                | 10          | 5         |                |
| <b>Gender</b>           |             |           | 1.000          |             |           | 1.000          |             |           | 1.000          |             |           | 0.1556         |
| <i>F</i>                | 2           | 0         |                | 2           | 2         |                | 2           | 0         |                | 1           | 2         |                |
| <i>M</i>                | 16          | 6         |                | 12          | 9         |                | 23          | 2         |                | 19          | 5         |                |
| <b>Race</b>             |             |           | 0.2518         |             |           | 0.0561         |             |           | 1.000          |             |           | 1.000          |
| <i>AA</i>               | 6           | 0         |                | 1           | 5         |                | 7           | 0         |                | 7           | 2         |                |
| <i>C</i>                | 11          | 6         |                | 12          | 6         |                | 17          | 2         |                | 12          | 5         |                |
| <i>H</i>                | 1           | 0         |                | 1           | 0         |                | 1           | 0         |                | 1           | 0         |                |
| <b>Etiology</b>         |             |           | 0.03666        |             |           | 0.0145         |             |           | 1.000          |             |           | 0.691          |
| <i>alcohol</i>          | 0           | 3         |                | 1           | 2         |                | 2           | 0         |                | 1           | 0         |                |
| <i>auto-immune</i>      | 2           | 0         |                | 4           | 0         |                | 3           | 0         |                | 3           | 0         |                |
| <i>nash_cryptogenic</i> | 3           | 0         |                | 3           | 0         |                | 4           | 0         |                | 3           | 0         |                |
| <i>viral</i>            | 9           | 3         |                | 6           | 5         |                | 13          | 2         |                | 10          | 5         |                |
| <i>others</i>           | 4           | 0         |                | 0           | 4         |                | 3           | 0         |                | 3           | 2         |                |
| <b>regimen</b>          |             |           | 0.8296         |             |           | 0.4583         |             |           | 0.3162         |             |           | 0.7836         |
| <i>M+S+Sim</i>          | 0           | 0         |                | 0           | 0         |                | 0           | 0         |                | 1           | 0         |                |
| <i>P+M+S</i>            | 6           | 1         |                | 3           | 4         |                | 9           | 0         |                | 7           | 1         |                |
| <i>P+S</i>              | 2           | 1         |                | 2           | 2         |                | 2           | 1         |                | 3           | 1         |                |
| <i>P+S+A</i>            | 10          | 4         |                | 9           | 4         |                | 14          | 1         |                | 8           | 5         |                |
| <i>Sim</i>              | 0           | 0         |                | 0           | 1         |                | 0           | 0         |                | 1           | 0         |                |

Patients distribution according to clinical factors and change status, CD8 related categories (**stable** patients were excluded). P values listed are from the Fisher exact test.
