# Supplementary material
Source: PubMed Central journal article supplement (PMC3631016)
Supplement: Supp_Table4.pdf [file Supp_Table4.pdf]

Suppl. Table 4A Comparison before transplantation (cohort T) vs. 1st bleed in normal cohort (H)

| Variable   | CD4 p_value   | CD4EFF p_value | CD4EM p_value | CD4CM p_value |
|------------|---------------|----------------|---------------|---------------|
| g+l+M+p+T- | <b>0.0471</b> | 0.2919         | 0.6882        | 0.0812        |
| g+l-M+p+T- | <b>0.0174</b> | 0.3741         | 0.8599        | 0.2516        |
| g-l+M+p-T- | 0.0640        | 0.2919         | 0.2210        | <b>0.0092</b> |
| g-l+M-p-T+ | 0.9911        | <b>0.0210</b>  | 0.1030        | 0.7808        |
| SUM        | <b>0.0022</b> | <b>0.0149</b>  | <b>0.0341</b> | <b>0.0008</b> |

Suppl. Table 4B CD4 comparisons

| CD4 Variable | Original p values |                |                |
|--------------|-------------------|----------------|----------------|
|              | Cohort: T vs H    | Cohort: T vs L | Cohort: H vs L |
| g+l-M-p-T+   | 0.2350            | <b>0.0166</b>  | 0.2022         |
| SUM          | <b>0.0022</b>     | 0.7064         | <b>0.0219</b>  |

Suppl. Table 4C CD4 effector cell comparisons

| CD4EFF Variable | Original p values |                |                |
|-----------------|-------------------|----------------|----------------|
|                 | Cohort: T vs H    | Cohort: T vs L | Cohort: H vs L |
| g-l+M+p+T+      | 1                 | <b>0.0041</b>  | <b>0.0493</b>  |
| g-l+M+p+T-      | 0.3015            | <b>0.0208</b>  | <b>0.0074</b>  |
| g-l+M-p-T-      | 0.1326            | <b>0.0010</b>  | 0.1702         |
| SUM             | <b>0.0149</b>     | <b>0.0092</b>  | <b>0.0001</b>  |

Suppl. Table 4D CD4 effector memory cell comparisons

| CD4EM Variable | Original p values |                |                |
|----------------|-------------------|----------------|----------------|
|                | Cohort: T vs H    | Cohort: T vs L | Cohort: H vs L |
| g+l-M+p+T-     | 1                 | <b>0.0012</b>  | <b>0.0216</b>  |
| g+l-M+p-T-     | 0.0980            | <b>0.0041</b>  | 0.3260         |
| g-l+M+p+T+     | 0.5420            | <b>0.0288</b>  | <b>0.0216</b>  |
| g-l+M+p+T-     | 0.6919            | <b>0.0046</b>  | <b>0.0069</b>  |
| g-l+M+p-T-     | 0.2210            | <b>0.0141</b>  | <b>0.0039</b>  |
| g-l+M-p-T+     | 0.1030            | <b>0.0025</b>  | 0.3781         |
| g-l-M+p-T+     | 0.3823            | <b>0.0031</b>  | 0.0679         |
| SUM            | <b>0.0341</b>     | <b>0.0014</b>  | <b>0.0002</b>  |

Suppl. Table 4E CD4 central memory cell comparisons

| CD4CM<br>Variable        | Original p values |                |                |
|--------------------------|-------------------|----------------|----------------|
|                          | Cohort: T vs H    | Cohort: T vs L | Cohort: H vs L |
| <i><b>g-I+M+p+T+</b></i> | 0.5420            | <b>0.0236</b>  | <b>0.0216</b>  |
| <i><b>g-I+M+p-T-</b></i> | <b>0.0092</b>     | 0.8234         | <b>0.0173</b>  |
| <i><b>g-I-M+p+T+</b></i> | 0.5420            | 0.0551         | <b>0.0493</b>  |
| <i><b>g-I-M-p-T+</b></i> | 0.1328            | 0.0156         | 0.4891         |
| <i><b>SUM</b></i>        | <b>0.0008</b>     | 0.3063         | 0.0948         |
