# Supplementary material
Source: PubMed Central journal article supplement (PMC3631016)
Supplement: Supp_Table5.pdf [file Supp_Table5.pdf]

Suppl. Table 5A Comparison before transplantation (cohort T) vs. 1st bleed in normal cohort (H)

| Variable   | CD8 p_value   | CD8EFF p-value | CD8EM p_value | CD8CM p_value |
|------------|---------------|----------------|---------------|---------------|
| g+l+M-p+T- | 0.7291        | <b>0.0079</b>  | 0.0906        | 0.2367        |
| g+l+M-p-T- | 0.1921        | 0.2960         | 0.0908        | <b>0.0238</b> |
| g+l-M+p+T+ | <b>0.0286</b> | 0.3200         | 1             | 1             |
| g+l-M+p-T+ | 0.7123        | 0.2325         | <b>0.0492</b> | 0.1124        |
| g+l-M+p+T- | 0.9817        | 0.4874         | <b>0.0286</b> | 0.5592        |
| g-l+M+p-T- | <b>0.0021</b> | 1              | 0.2919        | 0.0525        |
| g-l+M-p-T- | 0.9914        | <b>0.0080</b>  | 0.8466        | 0.4578        |
| g-l-M+p+T- | 0.8936        | <b>0.0472</b>  | 0.7910        | 0.4046        |
| SUM        | <b>0.0401</b> | 0.8772         | 0.0972        | 0.0628        |

Suppl. Table 5B CD8 comparisons

| CD8 Variable | Original p values |                |                |
|--------------|-------------------|----------------|----------------|
|              | Cohort: T vs H    | Cohort: T vs L | Cohort: H vs L |
| g+l-M+p+T+   | <b>0.0286</b>     | 0.3585         | 0.2612         |
| g-l+M+p+T+   | 1                 | 0.0001         | <b>0.0019</b>  |
| g-l+M+p+T-   | 0.1551            | 0.1367         | <b>0.0131</b>  |
| g-l+M+p-T-   | <b>0.0021</b>     | 0.8152         | <b>0.0216</b>  |
| g-l+M-p+T-   | 0.9304            | <b>0.0177</b>  | <b>0.0194</b>  |
| SUM          | 0.0401            | 0.8759         | 0.2858         |

Suppl. Table 5C CD8 effector cell comparisons

| CD8EFF Variable | Original p values |                |                |
|-----------------|-------------------|----------------|----------------|
|                 | Cohort: T vs H    | Cohort: T vs L | Cohort: H vs L |
| g+l+M+p+T+      | 0.5559            | <b>0.0244</b>  | <b>0.0493</b>  |
| g+l+M-p+T-      | <b>0.0079</b>     | <b>0.0414</b>  | 0.6622         |
| g-l+M+p+T+      | 1                 | <b>0.0414</b>  | 0.2336         |
| g-l+M+p+T-      | 0.7899            | <b>0.0081</b>  | 0.0693         |
| g-l+M-p-T-      | <b>0.0080</b>     | <b>0.0153</b>  | 0.6072         |
| g-l-M+p+T-      | <b>0.0472</b>     | <b>0.0005</b>  | 0.1632         |
| SUM             | 0.8772            | 0.1204         | 0.1088         |

**Suppl. Table 5D CD8 effector memory cell comparisons**

| CD8EM<br>Variable | Original p values |                |                |
|-------------------|-------------------|----------------|----------------|
|                   | Cohort: T vs H    | Cohort: T vs L | Cohort: H vs L |
| <b>g+l-M-p+T-</b> | <b>0.0286</b>     | <b>0.0414</b>  | 0.6824         |
| <b>g-l+M+p+T+</b> | 1                 | <b>0.0414</b>  | 0.2336         |
| <b>g-l+M+p+T-</b> | 0.8599            | <b>0.0113</b>  | 0.0593         |
| <b>g-l-M+p-T-</b> | 0.5702            | <b>0.0325</b>  | <b>0.0110</b>  |
| <b>SUM</b>        | 0.0972            | <b>0.0130</b>  | <b>0.0029</b>  |

**Suppl. Table 5E CD8 central memory cell comparisons**

| CD8CM<br>Variable | Original p values |                |                |
|-------------------|-------------------|----------------|----------------|
|                   | Cohort: T vs H    | Cohort: T vs L | Cohort: H vs L |
| <b>g-l+M+p+T+</b> | 1                 | <b>0.0012</b>  | <b>0.0410</b>  |
| <b>g-l+M+p+T-</b> | 0.9363            | <b>0.0021</b>  | <b>0.0180</b>  |
| <b>g-l-M+p+T+</b> | 0.0980            | <b>0.0132</b>  | 0.4173         |
| <b>g-l-M+p-T+</b> | 0.1012            | <b>0.0081</b>  | 0.3195         |
| <b>SUM</b>        | 0.0628            | 0.2431         | <b>0.0074</b>  |
